# Supplementary material for: Comparing the Normalized Difference Infrared Index (NDII) with root zonestorage in a lumped conceptual model
Source: Copernicus journal article supplement (doi:10.5194/hess-20-3361-2016), 2016-08-23
Supplement: Supplementary file [file hess-20-3361-2016-supplement.pdf]

Supplement of Hydrol. Earth Syst. Sci., 20, 3361–3377, 2016  
<http://www.hydrol-earth-syst-sci.net/20/3361/2016/>  
doi:10.5194/hess-20-3361-2016-supplement  
© Author(s) 2016. CC Attribution 3.0 License.

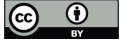

*Supplement of*

## **Comparing the Normalized Difference Infrared Index (NDII) with root zone storage in a lumped conceptual model**

**Nutchanart Sriwongsitanon et al.**

*Correspondence to:* Hubert H. G. Savenije (h.h.g.savenije@tudelft.nl)

The copyright of individual parts of the supplement might differ from the CC-BY 3.0 licence.

| Runoff Station | Annual                                                                                                                                                                                                                          | Wet Season                                                                                                                                                                                                                       | Dry Season                                                                                                                                                                                                                       |
|----------------|---------------------------------------------------------------------------------------------------------------------------------------------------------------------------------------------------------------------------------|----------------------------------------------------------------------------------------------------------------------------------------------------------------------------------------------------------------------------------|----------------------------------------------------------------------------------------------------------------------------------------------------------------------------------------------------------------------------------|
| P.4A           | 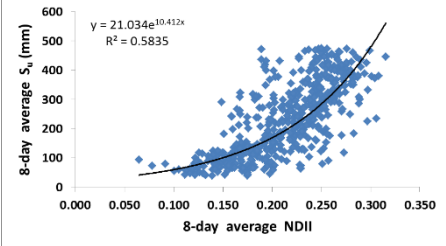 <p>8-day average <math>S_u</math> (mm)</p> <p><math>y = 21.034e^{10.412x}</math><br/><math>R^2 = 0.5835</math></p> <p>8-day average NDII</p>  |  <p>8-day average <math>S_u</math> (mm)</p> <p><math>y = 30.911e^{8.9043x}</math><br/><math>R^2 = 0.2772</math></p> <p>8-day average NDII</p>  |  <p>8-day average <math>S_u</math> (mm)</p> <p><math>y = 18.986e^{10.722x}</math><br/><math>R^2 = 0.8337</math></p> <p>8-day average NDII</p> |
| P.14           |  <p>8-day average <math>S_u</math> (mm)</p> <p><math>y = 29.524e^{8.932x}</math><br/><math>R^2 = 0.7508</math></p> <p>8-day average NDII</p>   |  <p>8-day average <math>S_u</math> (mm)</p> <p><math>y = 23.692e^{10.013x}</math><br/><math>R^2 = 0.4562</math></p> <p>8-day average NDII</p>  |  <p>8-day average <math>S_u</math> (mm)</p> <p><math>y = 30.979e^{8.5337x}</math><br/><math>R^2 = 0.8633</math></p> <p>8-day average NDII</p> |
| P.20           |  <p>8-day average <math>S_u</math> (mm)</p> <p><math>y = 14.107e^{11.616x}</math><br/><math>R^2 = 0.8256</math></p> <p>8-day average NDII</p> |  <p>8-day average <math>S_u</math> (mm)</p> <p><math>y = 10.075e^{13.251x}</math><br/><math>R^2 = 0.5329</math></p> <p>8-day average NDII</p> |  <p>8-day average <math>S_u</math> (mm)</p> <p><math>y = 14.821e^{11.08x}</math><br/><math>R^2 = 0.8715</math></p> <p>8-day average NDII</p> |

|              |                                                                                                                                                                                                                                 |                                                                                                                                                                                                                                   |                                                                                                                                                                                                                                    |
|--------------|---------------------------------------------------------------------------------------------------------------------------------------------------------------------------------------------------------------------------------|-----------------------------------------------------------------------------------------------------------------------------------------------------------------------------------------------------------------------------------|------------------------------------------------------------------------------------------------------------------------------------------------------------------------------------------------------------------------------------|
| <b>P.21</b>  | 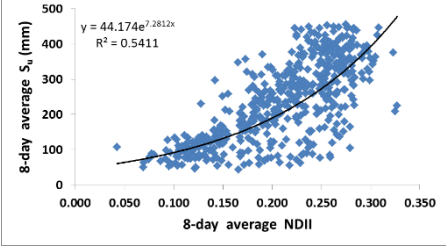 <p>8-day average <math>S_8</math> (mm)</p> <p><math>y = 44.174e^{7.2812x}</math><br/><math>R^2 = 0.5411</math></p> <p>8-day average NDII</p>  |  <p>8-day average <math>S_8</math> (mm)</p> <p><math>y = 51.041e^{6.5034x}</math><br/><math>R^2 = 0.2256</math></p> <p>8-day average NDII</p>   |  <p>8-day average <math>S_8</math> (mm)</p> <p><math>y = 37.456e^{8.4352x}</math><br/><math>R^2 = 0.7836</math></p> <p>8-day average NDII</p>   |
| <b>P.24A</b> |  <p>8-day average <math>S_8</math> (mm)</p> <p><math>y = 16.79e^{6.734x}</math><br/><math>R^2 = 0.5724</math></p> <p>8-day average NDII</p>    |  <p>8-day average <math>S_8</math> (mm)</p> <p><math>y = 41.079e^{1.9732x}</math><br/><math>R^2 = 0.1355</math></p> <p>8-day average NDII</p>   |  <p>8-day average <math>S_8</math> (mm)</p> <p><math>y = 14.86e^{9.0749x}</math><br/><math>R^2 = 0.7627</math></p> <p>8-day average NDII</p>    |
| <b>P.71</b>  |  <p>8-day average <math>S_8</math> (mm)</p> <p><math>y = 10.576e^{13.391x}</math><br/><math>R^2 = 0.6727</math></p> <p>8-day average NDII</p>  |  <p>8-day average <math>S_8</math> (mm)</p> <p><math>y = 13.27e^{12.265x}</math><br/><math>R^2 = 0.3222</math></p> <p>8-day average NDII</p>    |  <p>8-day average <math>S_8</math> (mm)</p> <p><math>y = 9.4932e^{14.181x}</math><br/><math>R^2 = 0.8204</math></p> <p>8-day average NDII</p>   |
| <b>P.76</b>  |  <p>8-day average <math>S_8</math> (mm)</p> <p><math>y = 89.13e^{5.2238x}</math><br/><math>R^2 = 0.6519</math></p> <p>8-day average NDII</p> |  <p>8-day average <math>S_8</math> (mm)</p> <p><math>y = 35.001e^{9.3927x}</math><br/><math>R^2 = 0.5717</math></p> <p>8-day average NDII</p> |  <p>8-day average <math>S_8</math> (mm)</p> <p><math>y = 95.824e^{5.4657x}</math><br/><math>R^2 = 0.7692</math></p> <p>8-day average NDII</p> |

**P.77**

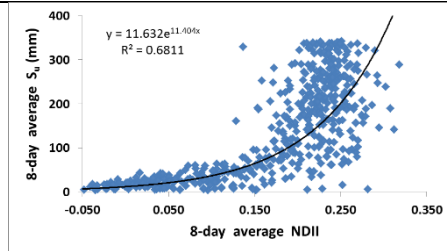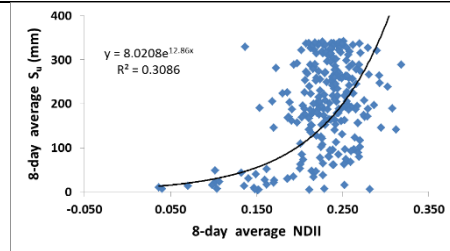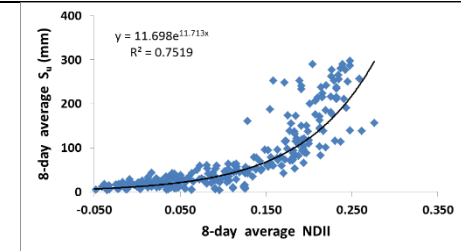

Figure S1. Scatter plots between the 8-days-lagged average NDII and the average root zone moisture storage ( $S_u$ ) for 8 sub-basins controlled by runoff stations.

| Runoff station | Annual                                                                                                                                                                                                                           | Wet Season                                                                                                                                                                                                                       | Dry Season                                                                                                                                                                                                                         |
|----------------|----------------------------------------------------------------------------------------------------------------------------------------------------------------------------------------------------------------------------------|----------------------------------------------------------------------------------------------------------------------------------------------------------------------------------------------------------------------------------|------------------------------------------------------------------------------------------------------------------------------------------------------------------------------------------------------------------------------------|
| <b>P.4A</b>    | 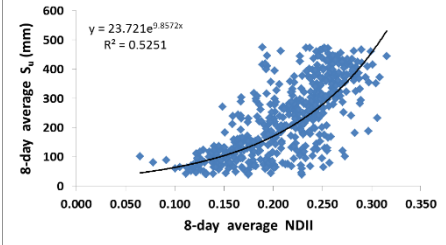 <p>8-day average <math>S_w</math> (mm)</p> <p><math>y = 23.721e^{0.8572x}</math><br/><math>R^2 = 0.5251</math></p> <p>8-day average NDII</p>   |  <p>8-day average <math>S_w</math> (mm)</p> <p><math>y = 28.182e^{0.9715x}</math><br/><math>R^2 = 0.2498</math></p> <p>8-day average NDII</p>  |  <p>8-day average <math>S_w</math> (mm)</p> <p><math>y = 21.061e^{10.597x}</math><br/><math>R^2 = 0.8248</math></p> <p>8-day average NDII</p>   |
| <b>P.14</b>    |  <p>8-day average <math>S_w</math> (mm)</p> <p><math>y = 32.518e^{8.383x}</math><br/><math>R^2 = 0.6649</math></p> <p>8-day average NDII</p>    |  <p>8-day average <math>S_w</math> (mm)</p> <p><math>y = 18.249e^{10.845x}</math><br/><math>R^2 = 0.4223</math></p> <p>8-day average NDII</p>  |  <p>8-day average <math>S_w</math> (mm)</p> <p><math>y = 34.13e^{8.455x}</math><br/><math>R^2 = 0.8494</math></p> <p>8-day average NDII</p>     |
| <b>P.20</b>    |  <p>8-day average <math>S_w</math> (mm)</p> <p><math>y = 15.763e^{10.943x}</math><br/><math>R^2 = 0.7394</math></p> <p>8-day average NDII</p> |  <p>8-day average <math>S_w</math> (mm)</p> <p><math>y = 7.4081e^{14.19x}</math><br/><math>R^2 = 0.4649</math></p> <p>8-day average NDII</p> |  <p>8-day average <math>S_w</math> (mm)</p> <p><math>y = 16.511e^{11.118x}</math><br/><math>R^2 = 0.8407</math></p> <p>8-day average NDII</p> |

**P.21**

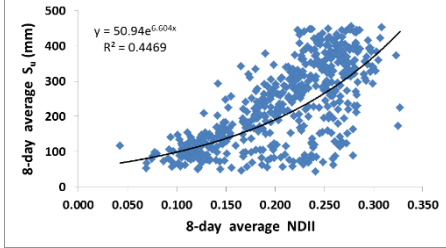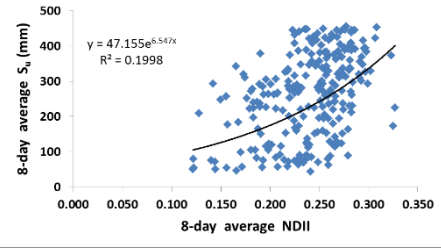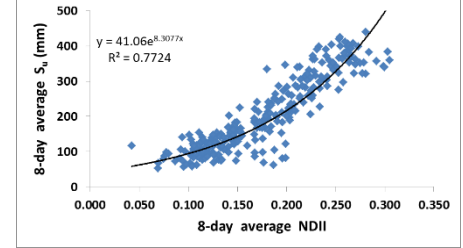

**P.24A**

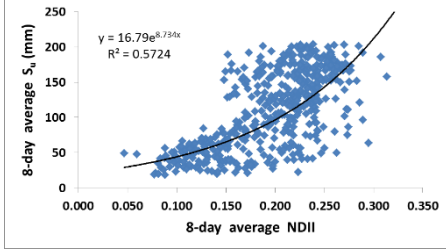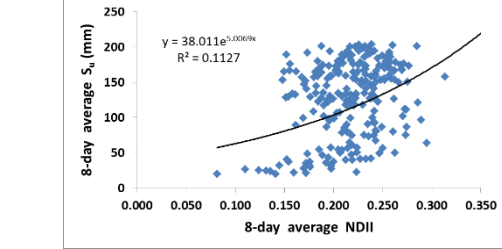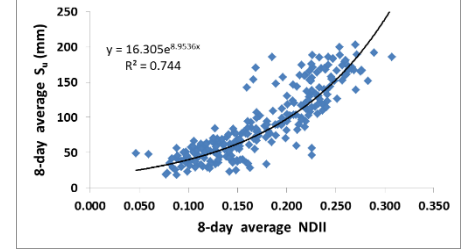

**P.71**

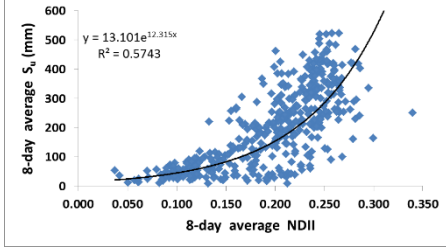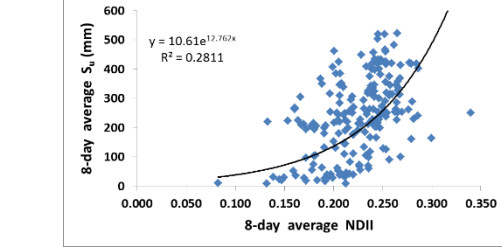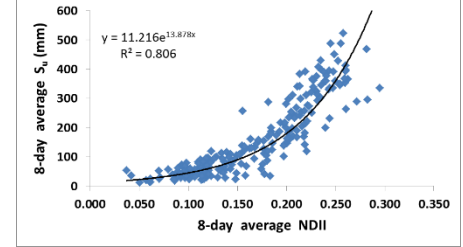

**P.76**

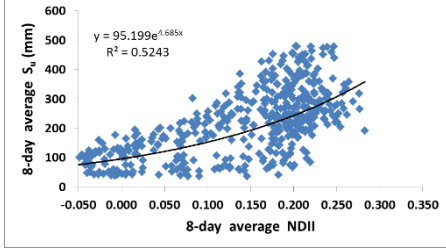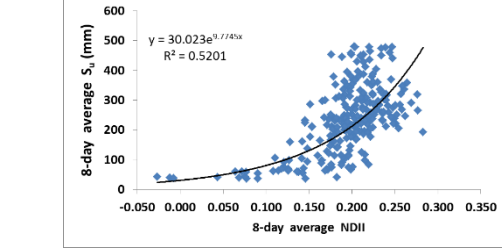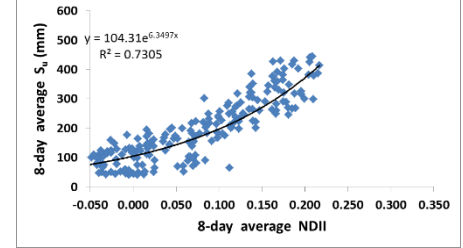

**P.77**

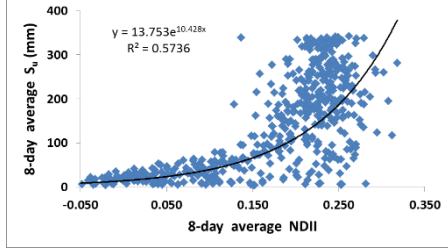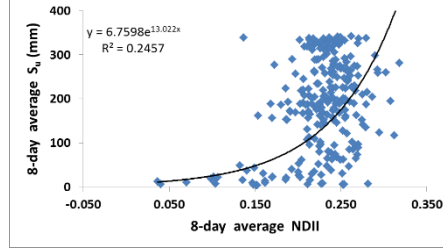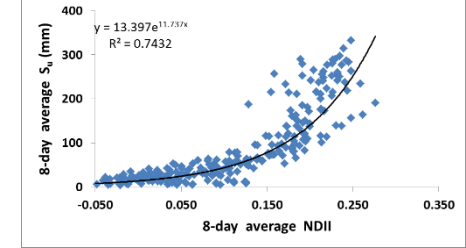

Figure S2. Scatter plots between the 16-days-lagged average NDII and the average root zone moisture storage ( $S_u$ ) for 8 sub-basins controlled by runoff stations.

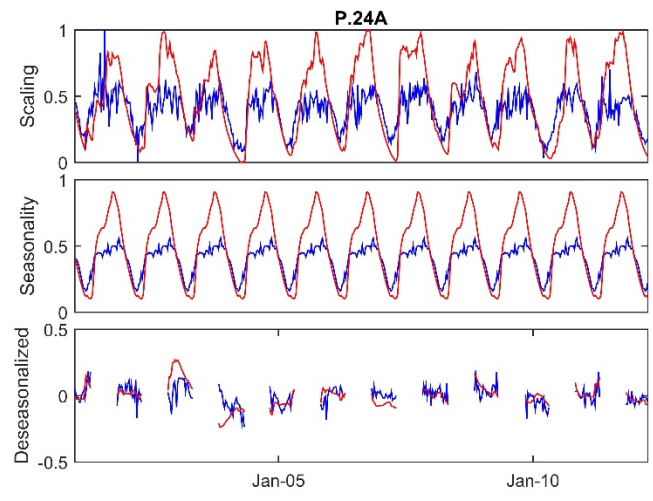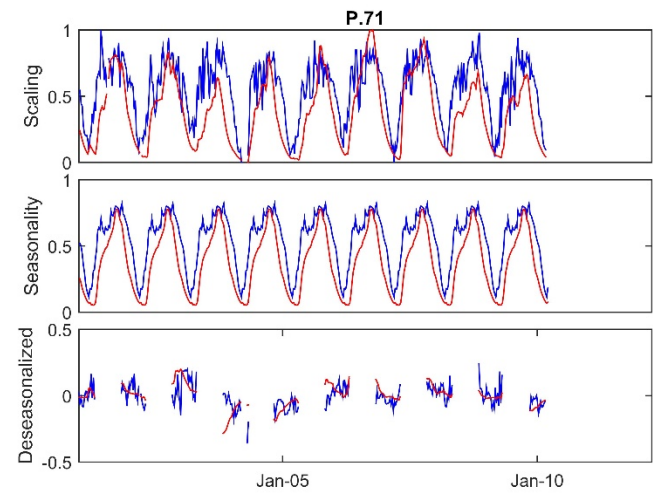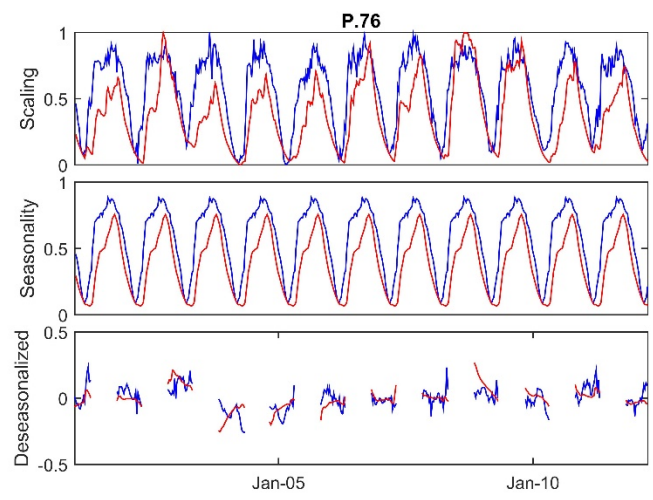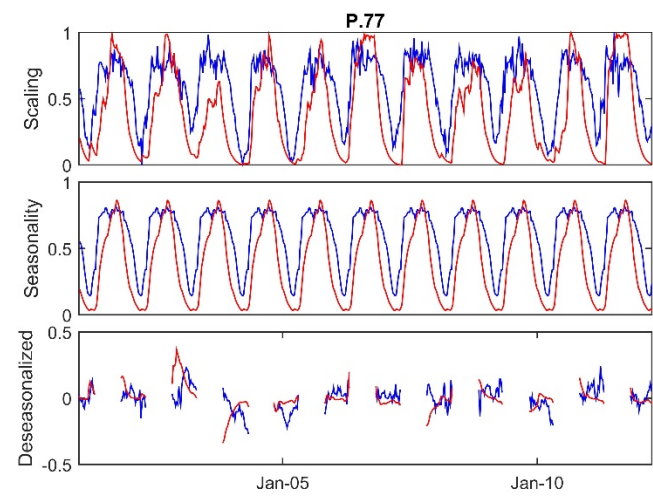



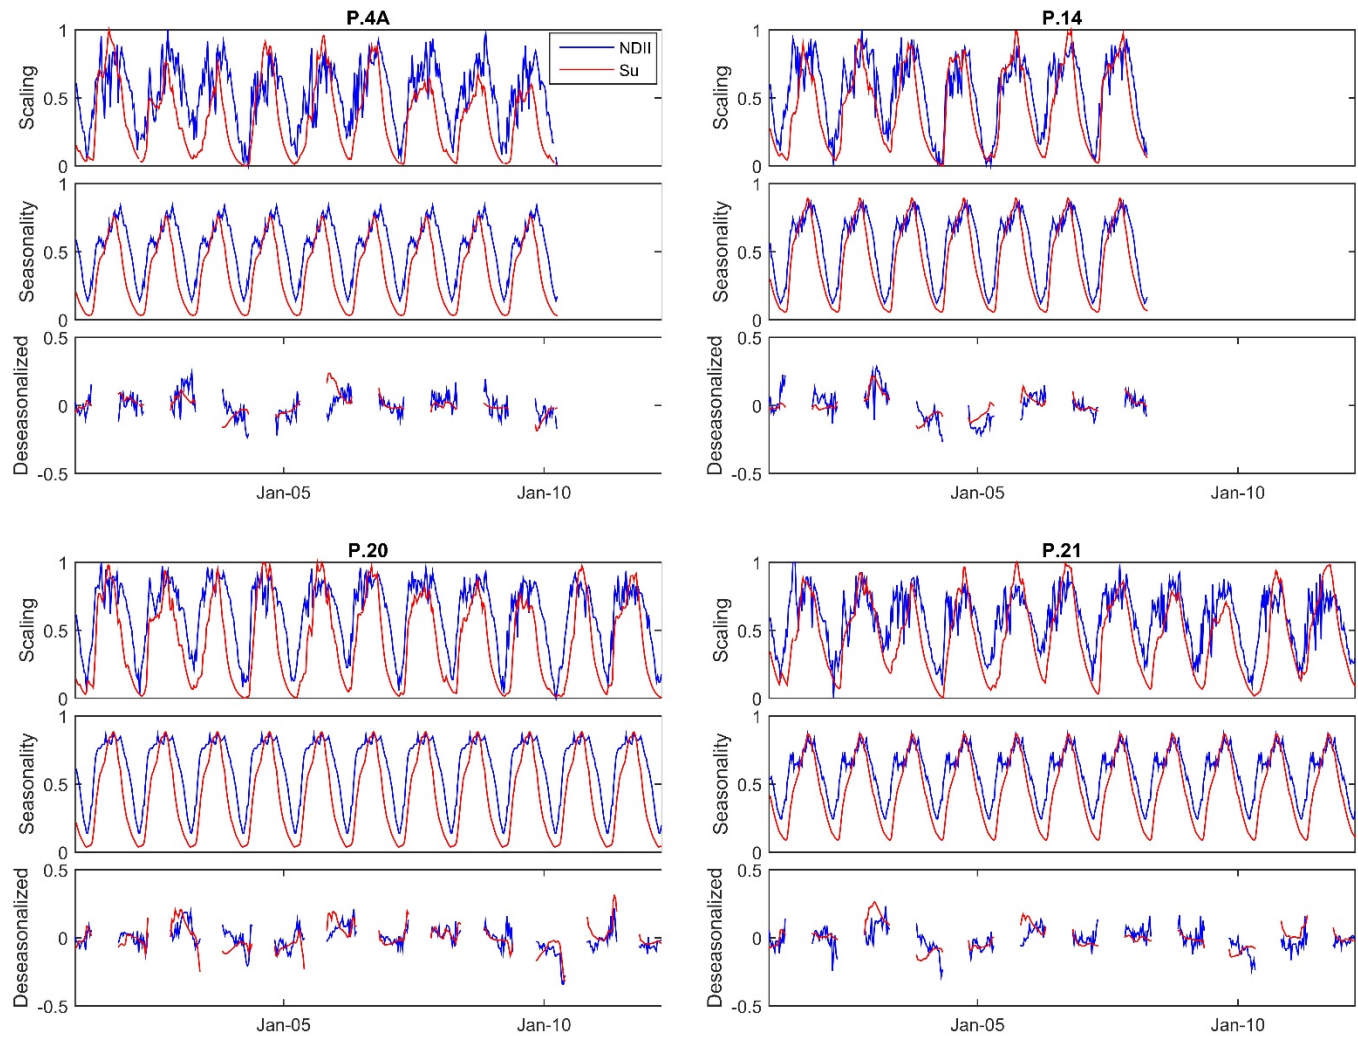

Figure S3. Scaled, seasonality and deseasonalized time series of the 8-days-averaged NDII values compared to the 8-days-averaged root zone moisture storage (Su) in 8 runoff stations.
